# Supplementary material
Source: PubMed Central journal article supplement (PMC6936760)
Supplement: NIHMS1007649-supplement-Proofs_and_details_of_MCMC_algorithms.pdf [file NIHMS1007649-supplement-Proofs_and_details_of_MCMC_algorithms.pdf]

# Supplementary material for A Bayesian Approach to Modeling Missing Not at Random Outcome Data: The Role of Identifying Restrictions

Antonio R. Linero\* and Michael J. Daniels†

August 31, 2017

## S.1 Proof of Proposition 3.1

*Proof.* [Sadinle and Reiter \(2017\)](#) show that ICI implies the existence of functions  $\eta_j(\bar{y}_{j-1})$  such that

$$\log \frac{p(S = j | Y = y)}{p(S = j - 1 | Y = y)} = \eta_j(\bar{y}_{j-1}). \quad (\text{S.1})$$

We show that this occurs if and only if NCMV is satisfied. First, suppose NCMV holds. Let  $f_j(y)$  denote  $p(y | S = j)$ , and, abusing notation, define  $f_j(y_k | \bar{y}_{k-1})$  to be  $p(y_k | S = j, \bar{Y}_{k-1} = \bar{y}_{k-1})$ . Then

$$\frac{p(S = j | Y = y)}{p(S = j - 1 | Y = y)} = \frac{p(S = j)}{p(S = j - 1)} \cdot \frac{f_j(\bar{y}_{j-1})f_j(y_j | \bar{y}_{j-1})}{f_{j-1}(\bar{y}_{j-1})f_{j-1}(y_j | \bar{y}_{j-1})} \cdot \frac{\prod_{k>j} f_j(y_k | \bar{y}_{k-1})}{\prod_{k>j} f_{j-1}(y_k | \bar{y}_{k-1})}.$$

Applying NCMV and canceling shared terms in the numerator and denominator gives

$$\frac{p(S = j | Y = y)}{p(S = j - 1 | Y = y)} = \frac{p(S = j)}{p(S = j - 1)} \cdot \frac{f_j(\bar{y}_{j-1})}{f_{j-1}(\bar{y}_{j-1})},$$

the right-hand-side of which can be chosen for  $\eta_j(\bar{y}_{j-1})$ .

Conversely, suppose that (S.1) holds. We prove the converse by showing that, for  $k < j$ ,

---

\*Department of Statistics, Florida State University, [arlinero@stat.fsu.edu](mailto:arlinero@stat.fsu.edu)

†Department of Statistics, University of Florida, [mjdaniels@stat.ufl.edu](mailto:mjdaniels@stat.ufl.edu)

$f_k(y_j | \bar{y}_{j-1}) = f_{k+1}(y_j | \bar{y}_{j-1})$ . Abusing notation, by Bayes theorem we have

$$\begin{aligned} f_{k+1}(y_j | \bar{y}_{j-1}) &= \frac{\int f(y)p(S = k + 1 | Y = y) dy_{j+1}, \dots, dy_j}{\int f(y)p(S = k + 1 | Y = y) dy_j, \dots, dy_j} \\ &= \frac{\int f(y)p(S = k | Y = y) dy_{j+1}, \dots, dy_j}{\int f(y)p(S = k | Y = y) dy_j, \dots, dy_j} \cdot \frac{\exp\{\eta_{k+1}(\bar{y}_k)\}}{\exp\{\eta_{k+1}(\bar{y}_k)\}} = f_k(y_j | \bar{y}_k). \end{aligned}$$

Crucially, note that this argument only holds for  $k < j$ ; otherwise, we would not be able to factor out  $\exp\{\eta_{k+1}(\bar{y}_k)\}$  in the denominator.  $\square$

## S.2 Markov chain Monte Carlo algorithm for the product-multinomial model

For completeness, we provide the MCMC algorithm used to fit the product-multinomial model used for the BCPT. For additional details, see [Dunson and Xing \(2009\)](#). The model

$$p^*(y, r) = \sum_{k=1}^{\infty} \pi_k \left\{ \prod_{j=1}^J \gamma_{kj}^{r_j} (1 - \gamma_{kj})^{1-r_j} \right\} \left\{ \prod_{j=1}^J \beta_{kj}^{y_j} (1 - \beta_{kj})^{1-r_j} \right\}. \quad (\text{S.2})$$

can be reformulated as a hierarchical model as follows. For each  $i$  we have

$$\begin{aligned} Z_i &\sim \text{Categorical}(\pi) \\ Y_{ij} &\sim \text{Bernoulli}(\beta_{kj}), \quad (\text{given } Z_i = k), \\ R_{ij} &\sim \text{Bernoulli}(\gamma_{kj}), \quad (\text{given } Z_i = k), \end{aligned}$$

with the  $Y_{ij}$ 's and  $R_{ij}$ 's conditionally independent given  $Z_i$ . We use a Gibbs sampling algorithm which samples from the full conditionals.

Following [Si and Reiter \(2013\)](#), we truncate the infinite mixture model at some fixed  $K < \infty$ ; unlike the usual latent-class setup, more mixture components are better. Let

$M_k = \sum_{i=1}^N I(Z_i = k)$  and  $M_{>k} = \sum_{i=1}^N I(Z_i > k)$ . Define

$$\begin{aligned} N_{\beta kj} &= \sum_{i:R_{ij}=1, Z_i=k} 1, & T_{\beta kj} &= \sum_{i:R_{ij}=1, Z_i=k} Y_{ij}, \\ N_{\gamma kj} &= \sum_{i:Z_i=k} 1, & T_{\gamma kj} &= \sum_{i:Z_i=k} R_{ij}. \end{aligned}$$

Then the full conditionals are given by

$$\begin{aligned} V_k &\stackrel{\text{indep}}{\sim} \text{Beta}(1 + M_k, \alpha + M_{>k}), & (1 \leq k \leq K - 1) \\ \beta_{kj} &\stackrel{\text{indep}}{\sim} \text{Beta}\{a_{\beta j} \rho_{\beta j} + T_{\beta kj}, a_{\beta j}(1 - \rho_{\beta j}) + N_{\beta kj} - T_{\beta kj}\} & (1 \leq k \leq K, 1 \leq j \leq J) \\ \gamma_{kj} &\stackrel{\text{indep}}{\sim} \text{Beta}\{a_{\gamma j} \rho_{\gamma j} + T_{\gamma kj}, a_{\gamma j}(1 - \rho_{\gamma j}) + N_{\gamma kj} - T_{\gamma kj}\} & (1 \leq k \leq K, 1 \leq j \leq J). \end{aligned}$$

Each distribution above is understood to be the conditional distribution given both the observed data  $(Y_{iR_i}, R_i : 1 \leq i \leq N)$  and the variables given on the other rows. We must also update the hyperparameters  $a_{\beta j}, \rho_{\beta j}, a_{\gamma j}, \rho_{\gamma j}$  for  $j = 1, \dots, J$ . The priors we used for these parameters are not conditionally conjugate. We use Metropolis-within-Gibbs for these parameters. The density of the full conditionals are (up-to a normalizing constant),

$$\begin{aligned} a_{\beta j} &\stackrel{\text{indep}}{\sim} \frac{\sigma}{(\sigma + a_{\beta j})^2} \prod_{k=1}^K \text{Beta}\{\beta_{kj} \mid a_{\beta j} \rho_{\beta j} + T_{\beta kj}, a_{\beta j}(1 - \rho_{\beta j}) + N_{\beta kj} - T_{\beta kj}\}, \\ \rho_{\beta j} &\stackrel{\text{indep}}{\sim} I(0 \leq \rho_{\beta j} \leq 1) \prod_{k=1}^K \text{Beta}\{\beta_{kj} \mid a_{\beta j} \rho_{\beta j} + T_{\beta kj}, a_{\beta j}(1 - \rho_{\beta j}) + N_{\beta kj} - T_{\beta kj}\}, \\ a_{\gamma j} &\stackrel{\text{indep}}{\sim} \frac{\sigma}{(\sigma + a_{\gamma j})^2} \prod_{k=1}^K \text{Beta}\{\gamma_{kj} \mid a_{\gamma j} \rho_{\gamma j} + T_{\gamma kj}, a_{\gamma j}(1 - \rho_{\gamma j}) + N_{\gamma kj} - T_{\gamma kj}\}, \\ \rho_{\gamma j} &\stackrel{\text{indep}}{\sim} I(0 \leq \rho_{\gamma j} \leq 1) \prod_{k=1}^K \text{Beta}\{\gamma_{kj} \mid a_{\gamma j} \rho_{\gamma j} + T_{\gamma kj}, a_{\gamma j}(1 - \rho_{\gamma j}) + N_{\gamma kj} - T_{\gamma kj}\}. \end{aligned}$$

Slice sampling (Neal, 2000) was used for the Metropolis-within-Gibbs steps. To improve mixing on the hyperparameters, it is also valid to ignore any mixture components with  $M_k = 0$ ; that

**Algorithm 1** Monte Carlo integration for PMAR

---

```

1: procedure GCOMP( $\theta, T, j$ )       $\triangleright$  Approximates  $\mu_j$  by simulating  $T$  samples from  $p_\theta(y)$ 
2:   for  $t = 1, \dots, T$  do
3:     Sample  $(Y_{R^{(t)}}, R^{(t)}) \sim p_\theta(y_r, r)$ .
4:     Sample  $Y_{-R^{(t)}}^{(t)} \sim p_\theta(Y_{s(-r)} \mid Y_r = y_r, R = \mathbf{1})$ .
5:   end for
6:   Set  $\mu_j = T^{-1} \sum_{s=1}^T Y_{sj}$ .
7:   return  $\mu_j$ 
8: end procedure

```

---

**Algorithm 2** Monte Carlo integration for tilted-last-occasion

---

```

1: procedure GCOMP( $\theta, T, \xi$ )       $\triangleright$  Approximates  $\mu_J$  by simulating  $T$  samples from  $p_\theta(y_J)$ 
2:   for  $t = 1, \dots, T$  do
3:     Sample  $(Y_{R^{(t)}}, R^{(t)}) \sim p_\theta(y_r, r)$ .
4:     if  $R_J^{(t)} = 0$  then
5:       Sample

```

$$Y_J^{(t)} \sim \frac{p_\theta(y_J \mid y_r, R^{(t)} = \mathbf{1})e^{\xi y_J}}{E_\theta(e^{\xi Y_J} \mid Y_r = y_r, R^{(t)} = \mathbf{1})}.$$

```

6:       end if
7:     end for
8:     Set  $\mu_J = T^{-1} \sum_{s=1}^T Y_{sJ}$ .
9:     return  $\mu_J$ 
10: end procedure

```

---

is, in each of the products above, we take the product over  $\{k : M_k > 0\}$ .

### S.3 Monte Carlo algorithms

In Algorithm 1 and Algorithm 2 we give the Monte Carlo integration algorithms used for PMAR and the tilted-last-occasion restriction in the analysis of the BCPT data in Section 5.

## S.4 Conditional distributions for the product-multinomial mixture model

For the model given in Section 5, we need to sample from the conditional distributions of (S.2). This task is straight-forward due to the within-class independence. For example, the conditional density  $p_\theta(y_{-r} \mid y_r, R = \mathbf{1})$  is given by

$$\begin{aligned} p_\theta^*(y_{-r} \mid y_r, \mathbf{1}) &= \frac{\sum_{k=1}^K \pi_k \left\{ \prod_{j=1}^J \gamma_{kj} \right\} \left\{ \prod_{j=1}^J \beta_{kj}^{y_j} (1 - \beta_{kj})^{1-y_j} \right\}}{\sum_{k=1}^K \pi_k \left\{ \prod_{j=1}^J \gamma_{kj} \right\} \left\{ \prod_{j:r_j=1} \beta_{kj}^{y_j} (1 - \beta_{kj})^{1-y_j} \right\}} \\ &= \sum_{k=1}^K \vartheta_k(y_r) \prod_{j:r_j=0} \beta_{kj}^{y_j} (1 - \beta_{kj})^{1-y_j}, \end{aligned}$$

where  $\sum_{k=1}^K \vartheta_k(y_r) = 1$  and

$$\vartheta_k(y_r) \propto \pi_k \left\{ \prod_{j=1}^J \gamma_{kj} \right\} \left\{ \prod_{j:r_j=1} \beta_{kj}^{y_j} (1 - \beta_{kj})^{1-y_j} \right\}.$$

Hence sampling from this conditional can be accomplished by choosing a mixture component  $k$  with probability  $\vartheta_k(y_r)$  and then sampling independently  $Y_j \sim \text{Bernoulli}(\beta_{kj})$ . The density of  $p_\theta(y_j \mid \bar{o}_{j-1})$  is given by

$$\frac{\sum_{k=1}^K \pi_k \left\{ \prod_{\ell=1}^{j-1} \gamma_{k\ell}^{r_\ell} (1 - \gamma_{k\ell})^{1-r_\ell} \right\} \left\{ \prod_{\ell < j, r_\ell=1} \beta_{k\ell}^{y_\ell} (1 - \beta_{k\ell})^{1-y_\ell} \right\} \beta_{kj}^{y_j} (1 - \beta_{kj})^{1-y_j}}{\sum_{k=1}^K \pi_k \left\{ \prod_{\ell=1}^{j-1} \gamma_{k\ell}^{r_\ell} (1 - \gamma_{k\ell})^{1-r_\ell} \right\} \left\{ \prod_{\ell < j, r_\ell=1} \beta_{k\ell}^{y_\ell} (1 - \beta_{k\ell})^{1-y_\ell} \right\}}.$$

As before, this can be written as  $\sum_{k=1}^K \vartheta_k(y_r, r) \beta_{kj}^{y_j} (1 - \beta_{kj})^{1-y_j}$  where

$$\vartheta_k(y_r, r) \propto \pi_k \left\{ \prod_{\ell=1}^{j-1} \gamma_{k\ell}^{r_\ell} (1 - \gamma_{k\ell})^{1-r_\ell} \right\} \left\{ \prod_{\ell < j, r_\ell=1} \beta_{k\ell}^{y_\ell} (1 - \beta_{k\ell})^{1-y_\ell} \right\}.$$

|      |    | ATE   | Lower limit | Upper limit | $P$ -value |
|------|----|-------|-------------|-------------|------------|
| MAR  | FB | 0.752 | -0.693      | 2.233       | 0.168      |
|      | MI | 0.638 | -0.874      | 2.150       | 0.204      |
| PMAR | FB | 0.497 | -0.992      | 2.005       | 0.258      |
|      | MI | 0.468 | -1.008      | 1.944       | 0.267      |
| SE   | FB | 4.091 | 0.841       | 7.410       | 0.006      |
|      | MI | 3.850 | 0.329       | 7.372       | 0.016      |
| TLO  | FB | 0.292 | -2.536      | 3.151       | 0.420      |
|      | MI | 0.331 | -2.557      | 3.218       | 0.411      |

Table S.2: Results for the BCPT study. MAR, PMAR, SE, and TLO denote the missing at random, pairwise missing at random, sequential explainability, and tilted-last-occasion models. FB denotes inference obtained using the fully-Bayes procedure while MI denotes inference obtained using multiple imputation. ATE denotes the point estimate of the average treatment effect, with lower and upper limits associated to a 95% credible interval. The posterior probability is associated to a one-sided test for  $\psi > 0$ .

## S.5 Results of BCPT

We provide the results for the BCPT from Figure 2 in tabular form in Table S.2. Results are given using both fully-Bayesian inference with the G-computation algorithm and multiple imputation with  $M = 50$  imputed datasets. We see that the inferences using either fully-Bayesian inference or multiple imputation largely agree.

## References

- Dunson, D. B. and Xing, C. (2009). Nonparametric bayes modeling of multivariate categorical data. *Journal of the American Statistical Association*, 104(487):1042–1051.
- Neal, R. M. (2000). Markov chain sampling methods for Dirichlet process mixture models. *Journal of Computational and Graphical Statistics*, 9:249–265.
- Sadinle, M. and Reiter, J. P. (2017). Itemwise conditionally independent nonresponse modeling for incomplete multivariate data. *Biometrika*, 104(1):207–220.

Si, Y. and Reiter, J. P. (2013). Nonparametric Bayesian multiple imputation for incomplete categorical variables in large-scale assessment surveys. *Journal of Educational and Behavioral Statistics*, 38(5):499–521.
